# Supplementary material
Source: PubMed Central journal article supplement (PMC3616672)
Supplement: supp_bgs405_Supplementary_Materials.pdf [file supp_bgs405_Supplementary_Materials.pdf]

**Supplementary Fig.1.** (A-F) Nuclear accumulation of total  $\beta$ -catenin and unphosphorylated  $\beta$ -catenin in OSE cells (arrowheads) and pretumoral lesions (arrows) of mutant ovaries. In contrast, only membranous staining for  $\beta$ -catenin was observed in OSE cells of control ovaries, and follicles (asterisk) of control and mutant ovaries. (G) TCF1 and LEF1 expression in 4wk old control (a&c) and mutant (b&d) ovaries. (H) Western blot analyses of  $\beta$ -catenin, pGSK3 $\beta$ , GSK3 $\beta$ , LEF1, TCF1, Cyclin d1 between control and mutant ovaries (n=3/each).  $\beta$ -actin was used as loading control. (I) Gross ovaries from control,  $APC^{cko/+}$  and  $APC^{cko}$  mice. Bars=50um.

**Supplementary Fig.2.** H&E staining of control (A&B),  $APC^{cko/+}$  (C&D), and  $APC^{cko}$  (E&F) ovaries showing normal ovarian histology, including OSE cells (arrow). Normal looking follicles (f) and corpora lutea (cl) were observed in all three groups of animals. (G-J) Hyperplasia (arrow) and shedding (arrowhead) OSE cells was observed in mutant but not control ovaries at 4 months of age. Bars=50um.

**Supplementary Fig. 3.** (A&B) Total  $\beta$ -catenin and unphosphorylated  $\beta$ -catenin expression in OEAs formed in  $APC^{cko}$  mice. Cystic (cy) development in  $APC^{cko}$  ovaries (C). Cytokeratin 8 (CK8) positive cysts in  $APC^{cko}$  ovaries (D). Positive control (mouse oviduct) for CK8 staining (E). Bars=50um.

**Supplementary Fig. 4.** P27kip1 (A&B) and FOXO1 (C&D) protein in control and mutant ovaries. Arrow in panel A marking ovarian surface epithelium. Arrowheads in B and D pointing to the cancerous lesions in mutant ovaries. Ovi: oviduct. Bars=50um.

**Supplementary Fig. 5.** HOSE cells infected with control vector (A a-c), CA- $\beta$ -catenin (A d-f), and APC (A g). H&E stained section of tumor formed in NOD/SCID s/c transplanted with AN3CA, an endometrial cancer cell line (B). Intraperitoneal tumors were observed grossly attached to intestine in some CA  $\beta$ -catenin HOSE-injected mice (C, a-f) and in APCkd HOSE-injected mice (C, g and h). Bars=50um.

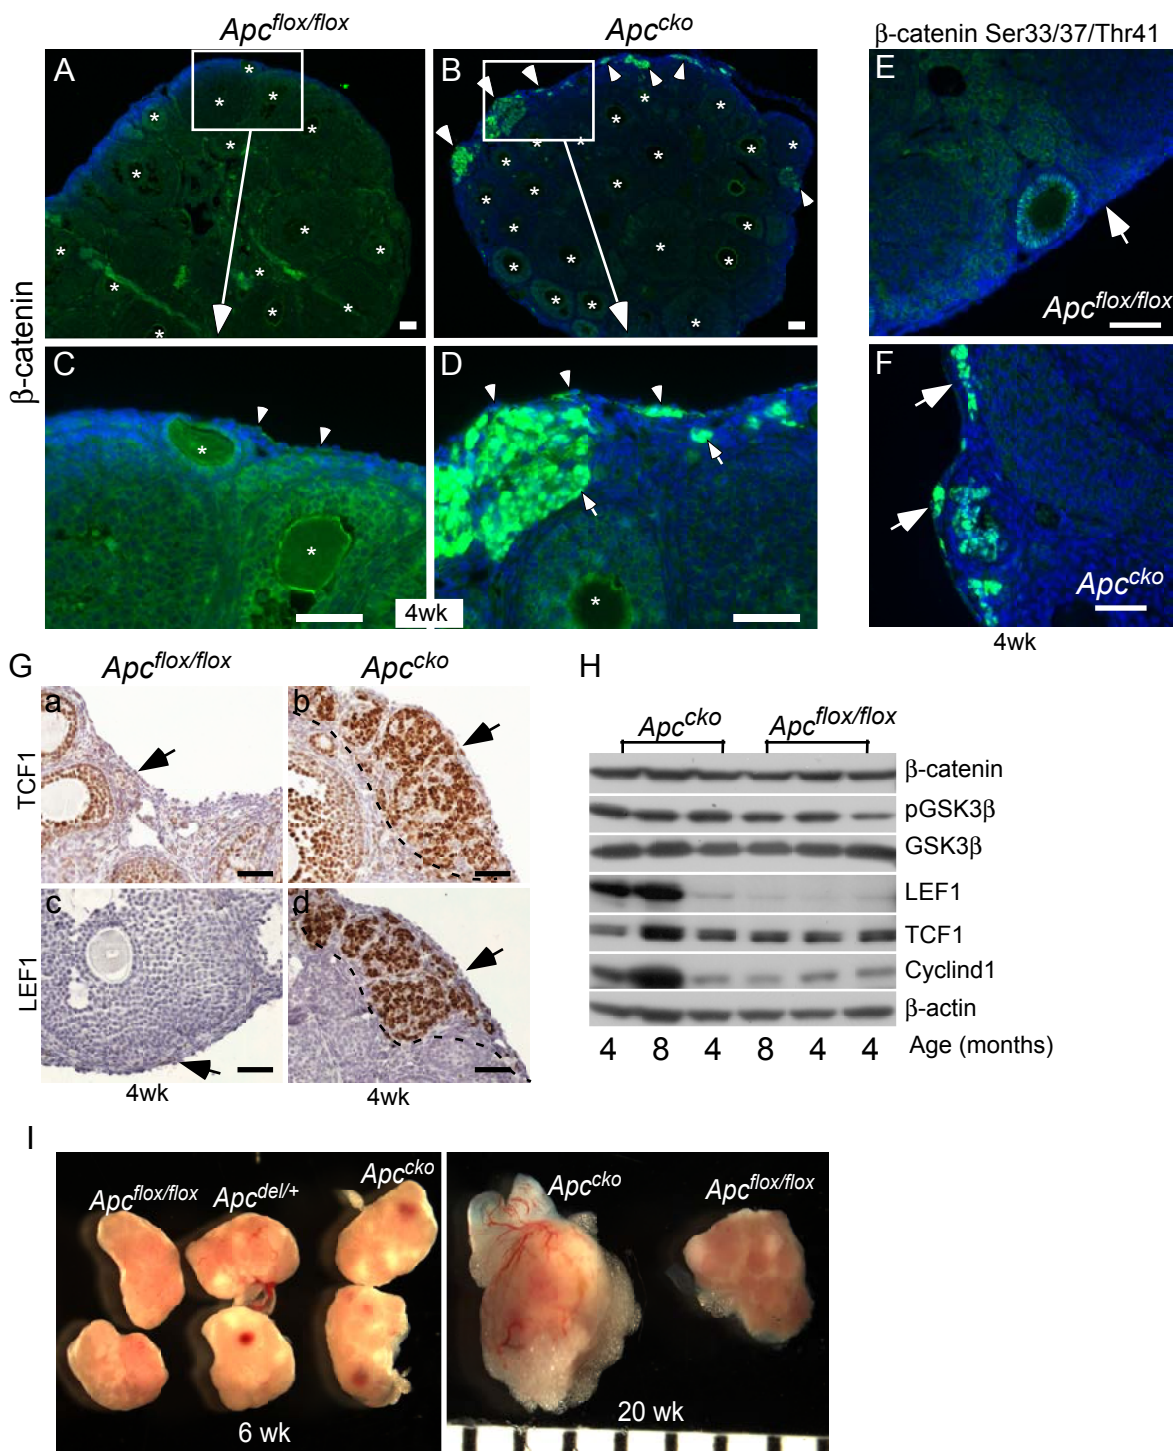

SFig. 1

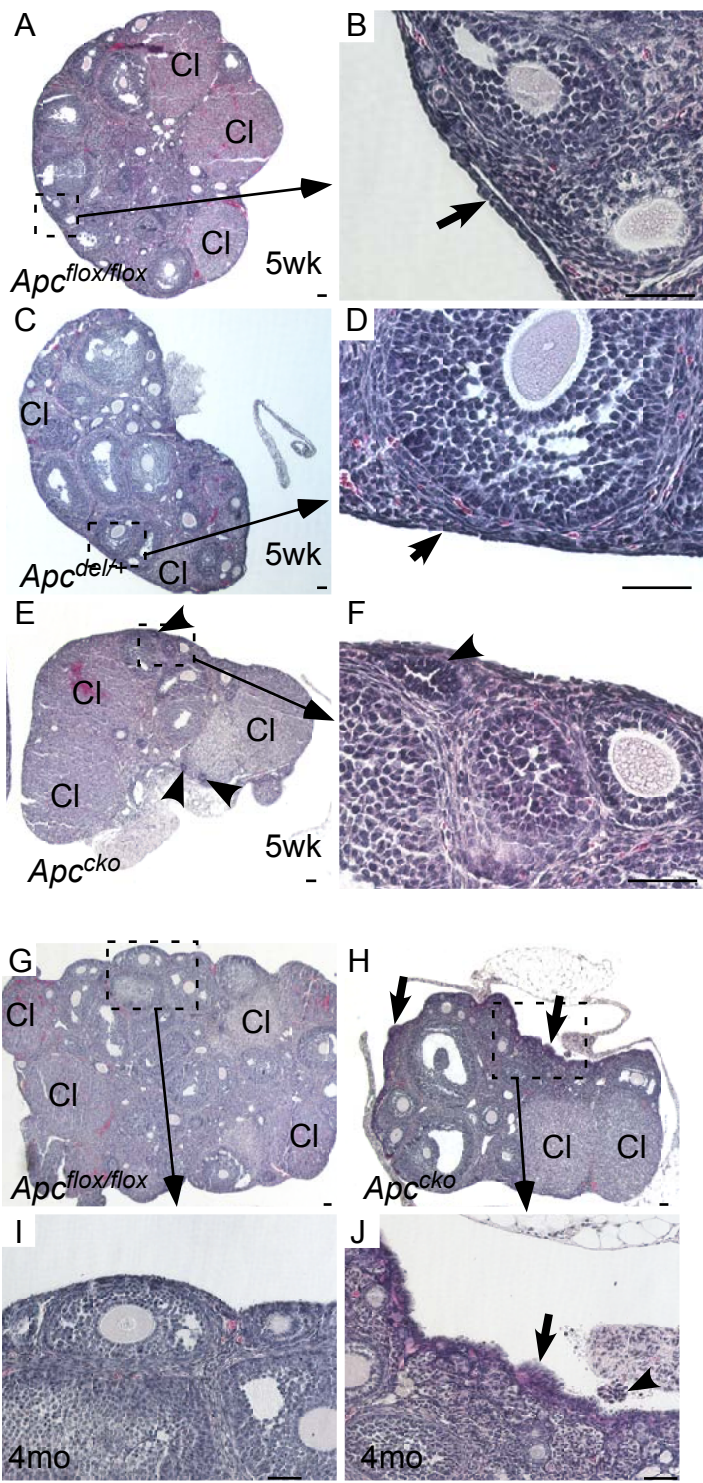

SFig. 2

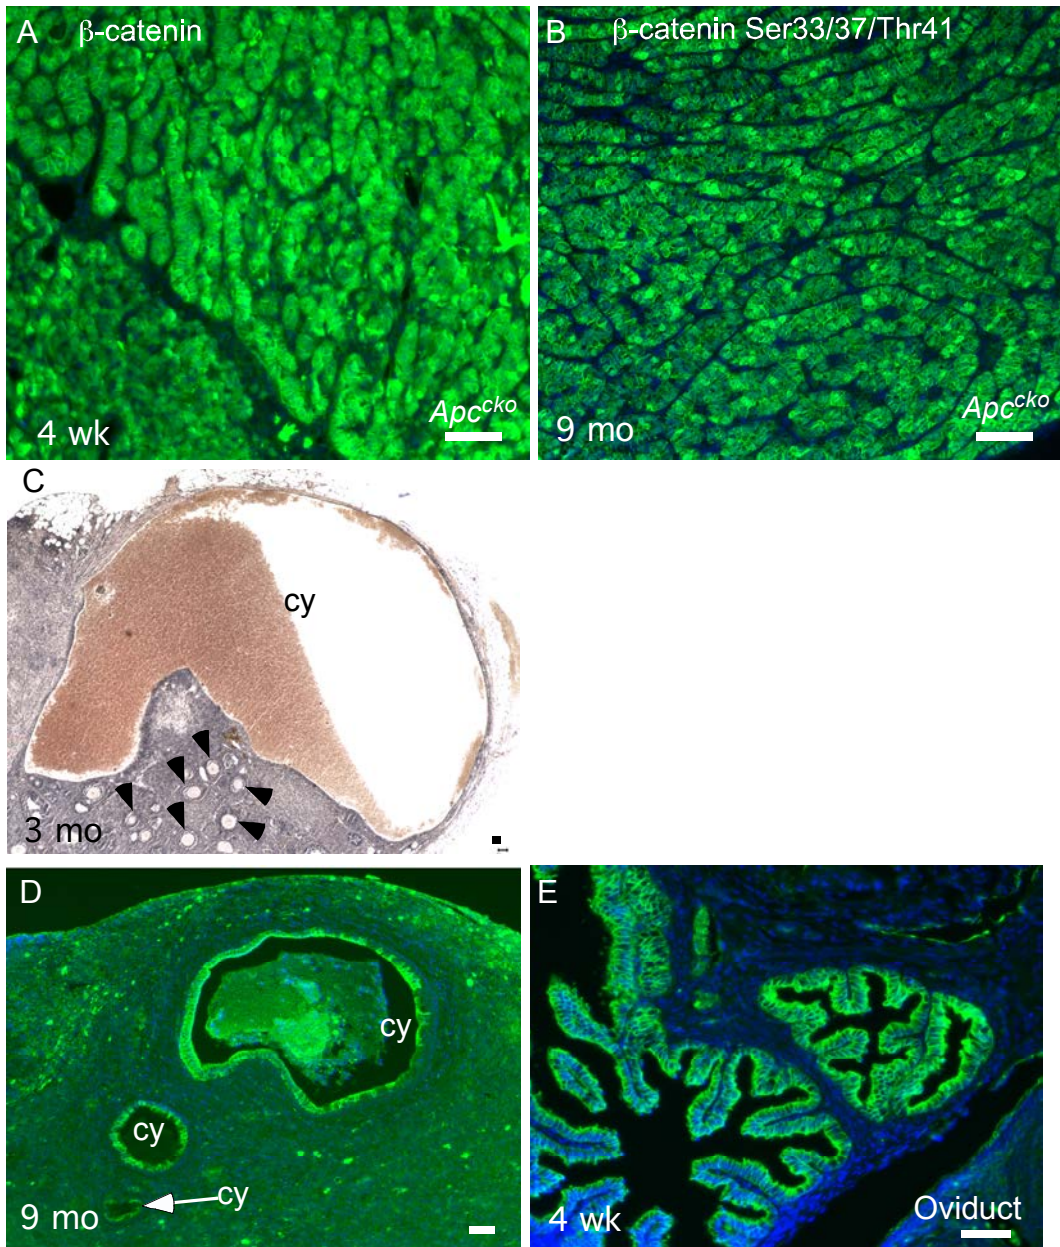

SFig. 3

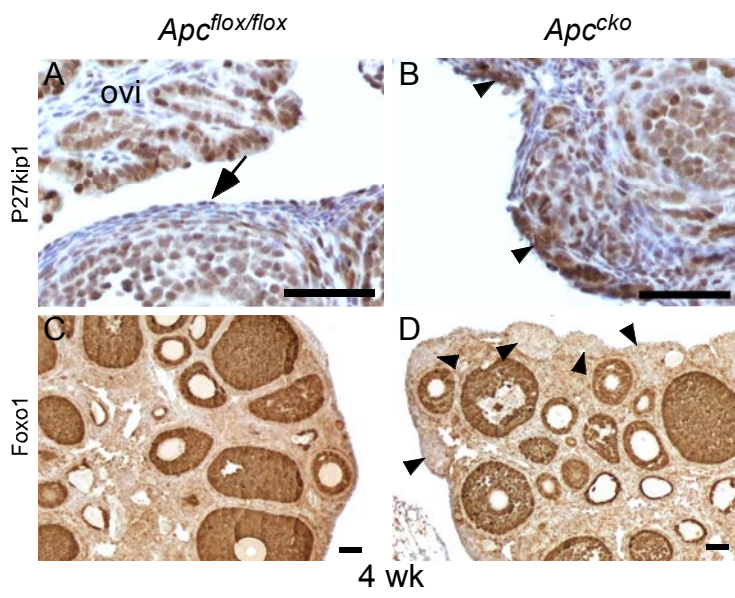

SFig. 4

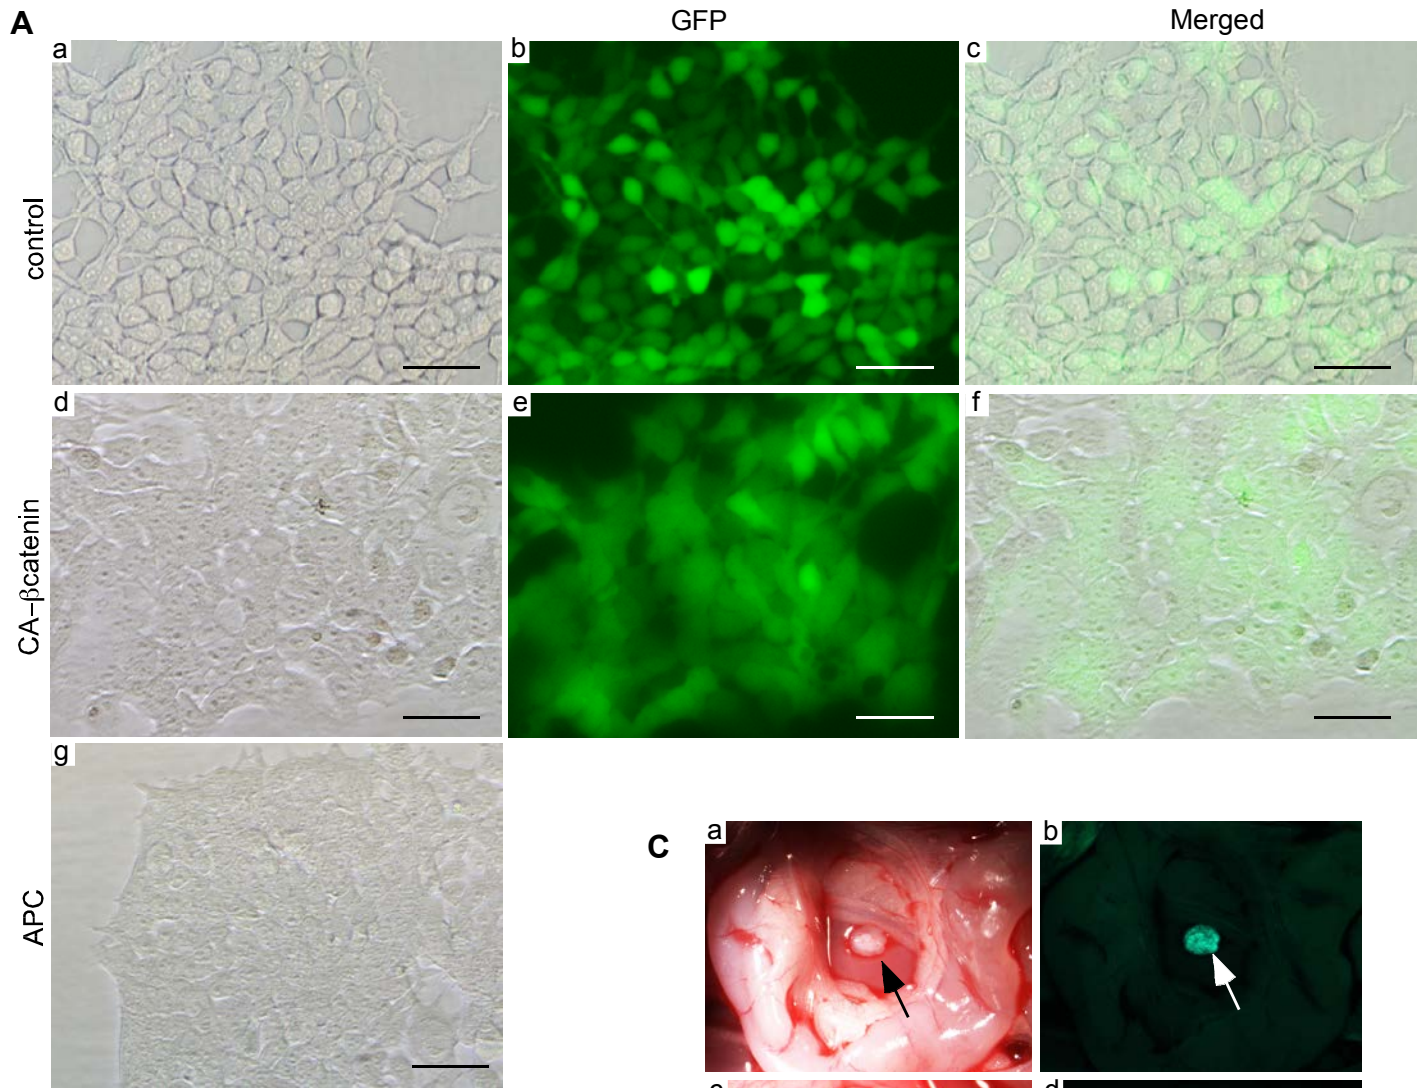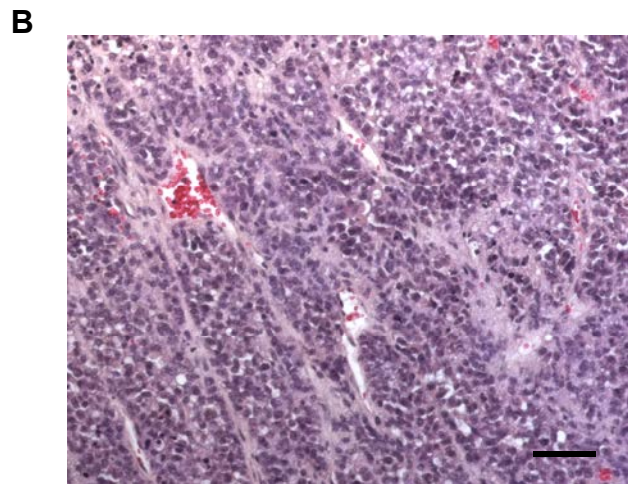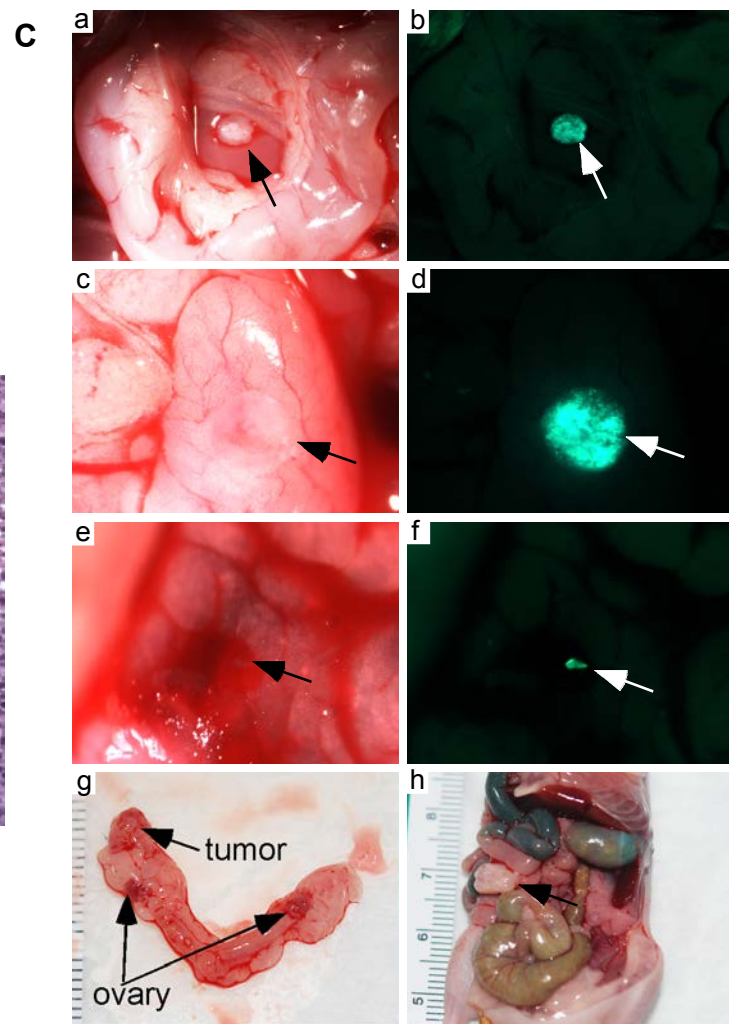

SFig. 5

Supplementary Table I. Classification and characterization of oocytes collected from control and mutant mice ovaries.\*

| <b>Oocytes</b>                    | <b>Control (n=4)</b> | <b>Mutant (n=5)</b> | <b>Significance</b> |
|-----------------------------------|----------------------|---------------------|---------------------|
| <b>Metaphase II</b>               | 26.33±2.08           | 14±4.24             | p=0.006             |
| <b>Germinal Vesicle Breakdown</b> | 3.67±0.29            | 2±0                 | p=0.1               |
| <b>Germinal Vesicle Intact</b>    | 0.00±0.00            | 0±0                 |                     |
| <b>Atretic</b>                    | 2.67±1.89            | 7±2.83              | p=0.3               |
| <b>Total</b>                      | 32.67±2.47           | 23±7.07             |                     |

\*Values represent mean ± SD

Supplementary Table II. Fertilization efficiency and embryo quality of oocytes from control and mutant mice.

|                      | <b>Control (n=3)</b> | <b>Mutant (n=3)</b> | <b>Significance</b> |
|----------------------|----------------------|---------------------|---------------------|
| <b>Metaphase II</b>  | 23.33 ± 1.67         | 18.33 ± 1.67        | p=0.1               |
| <b>Fertilization</b> | 13.67 ± 2.03         | 10.33 ± 1.20        | p=0.2               |
| <b>2-cell</b>        | 13.67 ± 2.03         | 10.33 ± 1.20        | p=0.2               |
| <b>Blastocyst</b>    | 10.00 ± 1.53         | 7.333 ± 1.20        | p=0.2               |

\*Values represent the mean ± SD.
